# Supplementary material for: High efficiency solar cells tailored using biomass-converted graded carbon quantum dots
Source: Royal Society of Chemistry journal article supplement (doi:10.1039/c9nr05957a), 2019-01-01
Supplement: c9nr05957a1.pdf [file c9nr05957a1.pdf]

## Supplementary Tables and Figures

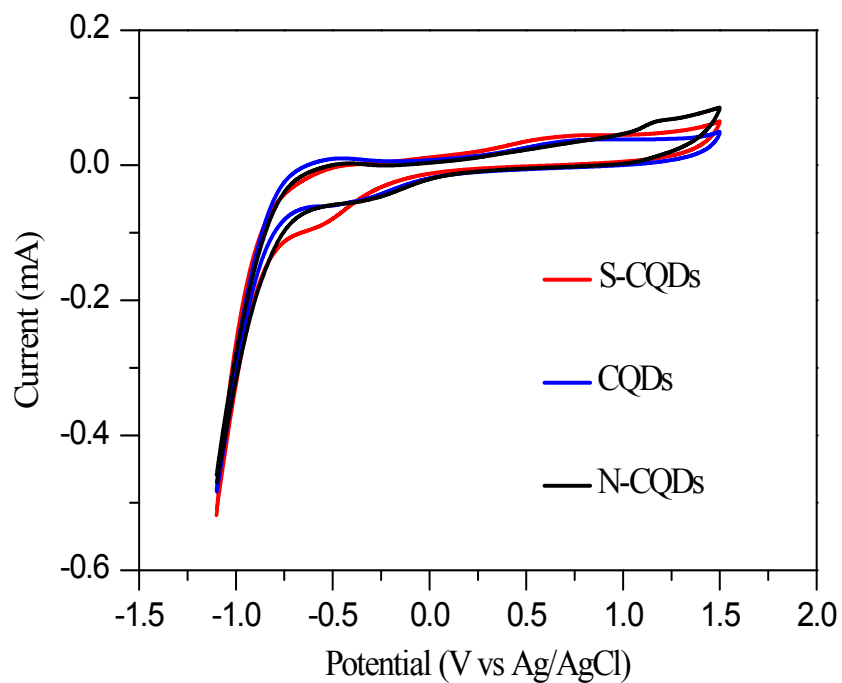

**Fig. S1.** CV curves of different CQDs on a platinum electrode in 0.1 M tetrabutylammonium hexafluorophosphate in acetonitrile at a scanning rate of 50 mV s<sup>-1</sup>.

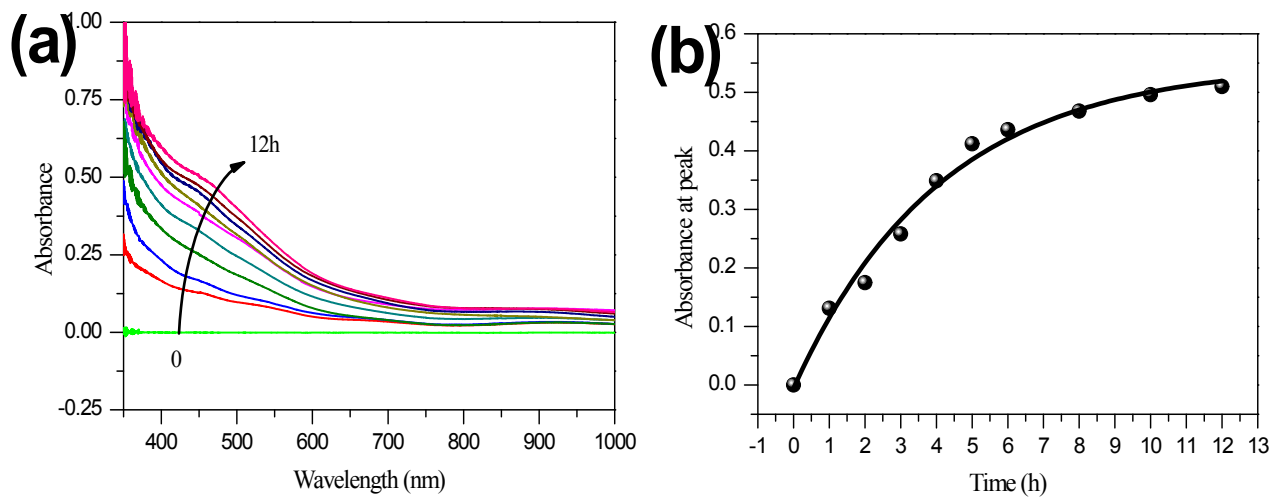

**Fig. S2.** (a) UV-vis absorption spectra of *m*-TiO<sub>2</sub>/N-CQDs photoanodes at immersion time range of 0-12 h. (b) Plots of absorbance at 450 nm as a function of immersion time.
